# Supplementary material
Source: publisher figshare collection journal article supplement (https://acs.figshare.com/ndownloader/files/4859104)
Supplement: Supplementary file 1 [file 4859104]

## Supporting Information - Control of Nanomaterial Self-Assembly in Ultrasonically Levitated Droplets

Annala M. Seddon<sup>†§</sup>, Sam J. Richardson<sup>‡</sup>, Kunal Rastogi<sup>‡</sup>, Tomás S. Plivelic<sup>⊥</sup>, Adam M. Squires<sup>‡\*</sup>, Christian Pfrang<sup>‡\*</sup>

<sup>†</sup>H.H. Wills Physics Laboratory, Tyndall Avenue, University of Bristol, BS8 1TL, UK; <sup>§</sup>Bristol Centre for Functional Nanomaterials, H.H. Wills Physics Laboratory, Tyndall Avenue, University of Bristol, BS8 1TL; <sup>‡</sup>Department of Chemistry, Whiteknights Campus, University of Reading, RG6 6AD, UK; <sup>⊥</sup>MAX IV Laboratory, Lund University, 22100 Lund, Sweden

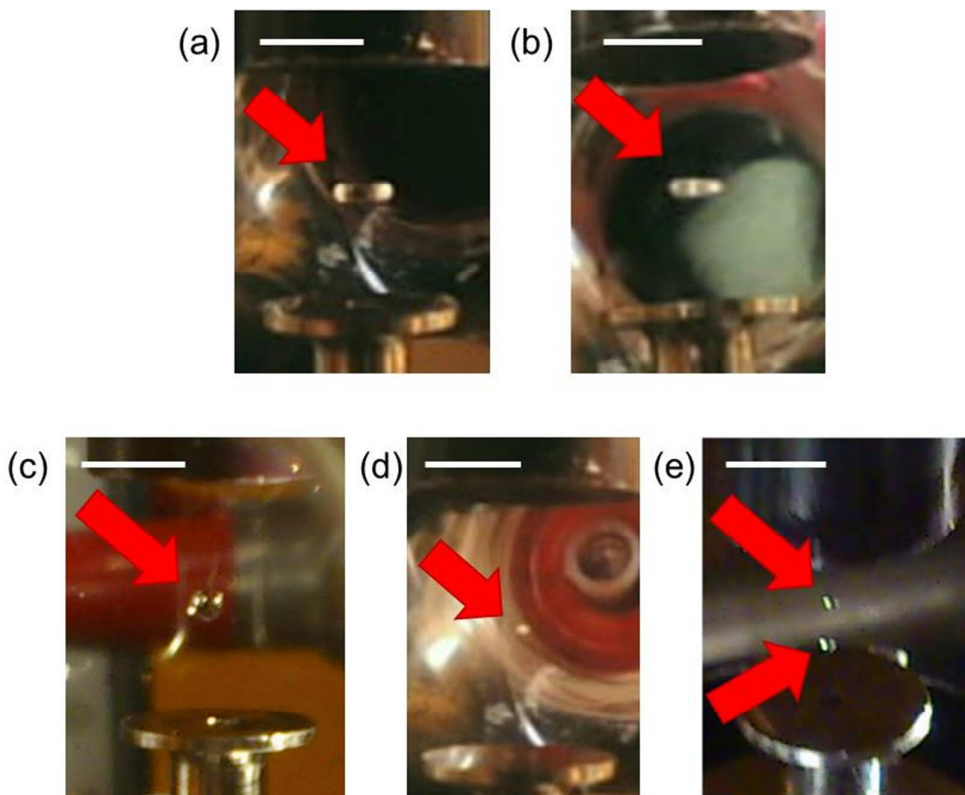

**Figure S1:** Representative images of levitated droplets: ellipsoidal (most common) (a),(b); spherical (c); small non-transparent (d); two droplets trapped in different nodes (e). Arrows indicate droplet locations and white scale bars correspond to 5 mm.

## Supporting Information - Control of Nanomaterial Self-Assembly in Ultrasonically Levitated Droplets

Annela M. Seddon, Sam J. Richardson, Kunal Rastogi, Tomás S. Plivelic, Adam M. Squires, Christian Pfrang

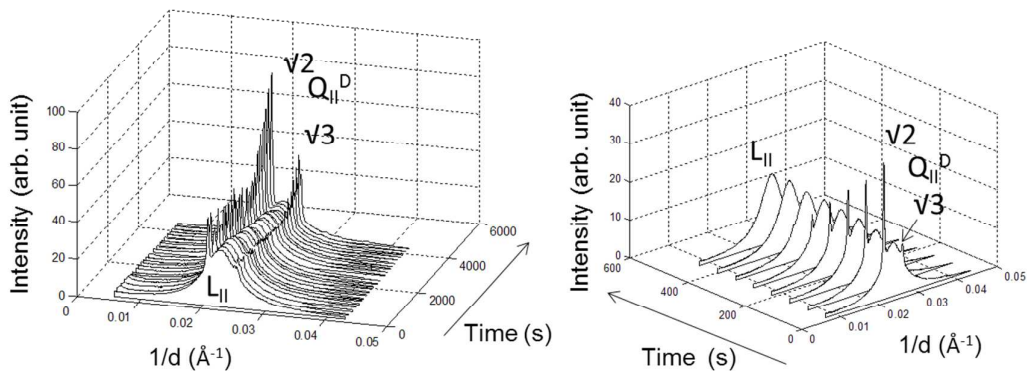

**Figure S2:** Phase changes between  $L_{II}$  and  $Q_{II}^D$  phases of phyantriol / 10% glycerol on increasing (left) and decreasing (right) relative humidity.

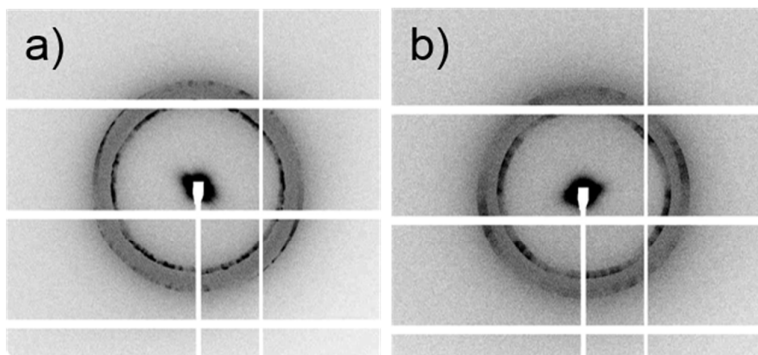

**Figure S3:** 2D SAXS patterns from the edges of an acoustically levitated droplet formed from Phyantriol in 20% glycerol at a relative humidity of 75%; a) left; b) right.
